# Supplementary material
Source: PubMed Central journal article supplement (PMC7047530)
Supplement: NIHMS1545172-supplement-1.pdf [file NIHMS1545172-supplement-1.pdf]

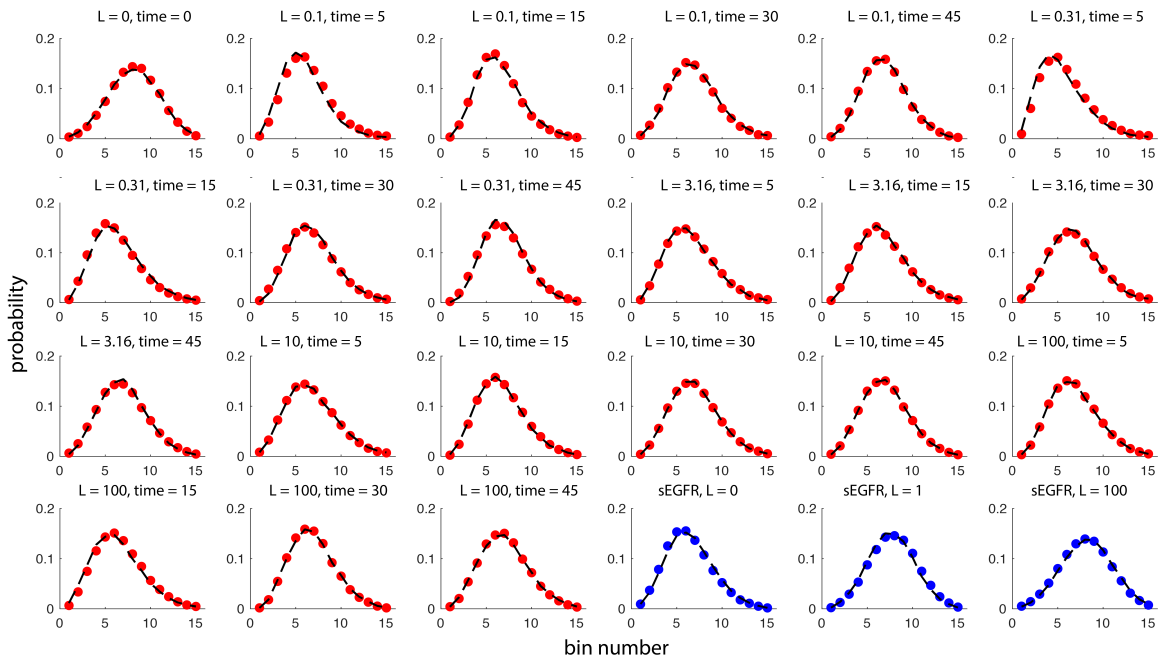

1

2 **Supplemental Information Figure 1. Related to Figure 3. 21 fitted pAkt**  
 3 **distributions and 3 fitted sEGFR distributions used in parameter inference for**  
 4 **synthetic data; parametrization 1: Wild type.** We show all fitted single cell  
 5 distributions (pAkt fits in red, sEGFR fits in blue, *in silico* experimental data in black)  
 6 used in the inference.

7

8

9

10

11

12

13

14

15

16

17

18

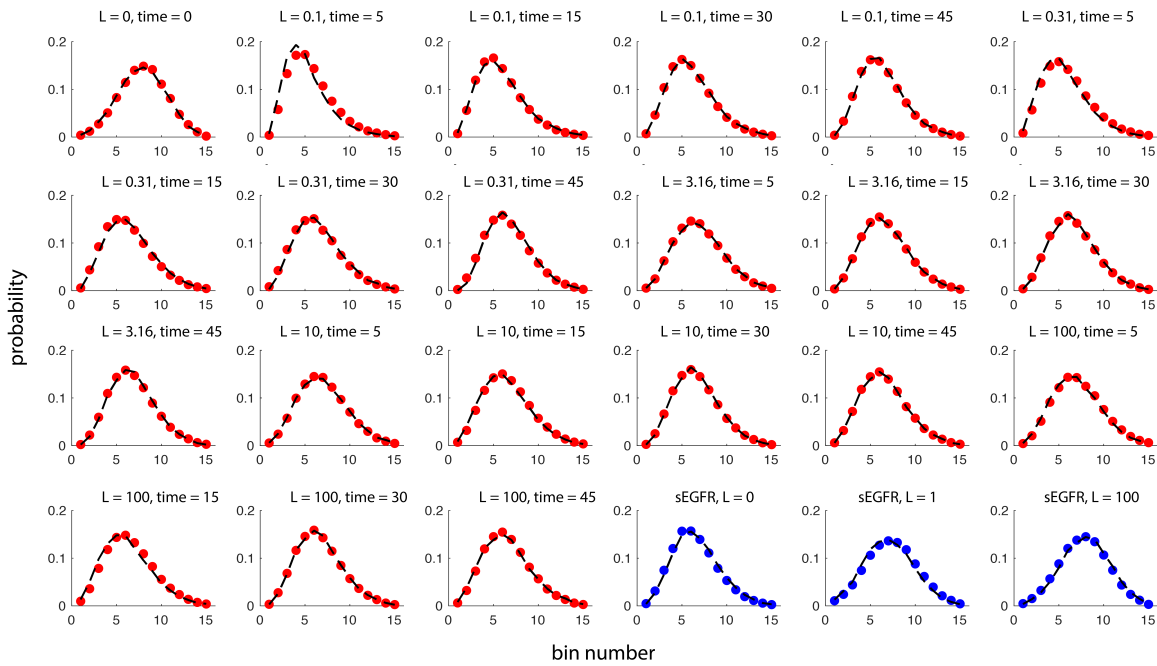

19

20 **Supplemental Information Figure 2. Related to Figure 3. 21 fitted pAkt**  
 21 **distributions and 3 fitted sEGFR distributions used in parameter inference for**  
 22 **synthetic data; parametrization 2: EGFR overexpression. We show all fitted single**  
 23 **cell distributions (pAkt fits in red, sEGFR fits in blue, *in silico* experimental data in black)**  
 24 **used in the inference.**

25

26

27

28

29

30

31

32

33

34

35

36

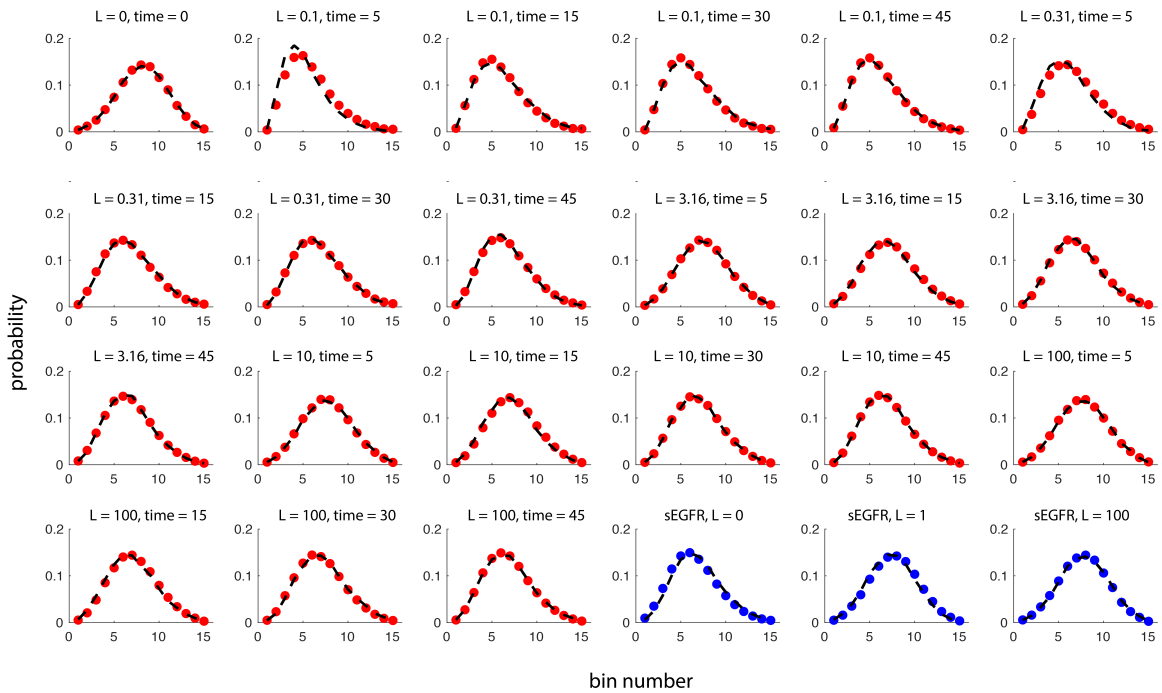

37

38 **Supplemental Information Figure 3. Related to Figure 3. 21 fitted pAkt**  
 39 **distributions and 3 fitted sEGFR distributions used in parameter inference for**  
 40 **synthetic data; parametrization 3: PTEN loss.** We show all fitted single cell  
 41 distributions (pAkt fits in red, sEGFR fits in blue, *in silico* experimental data in black)  
 42 used in the inference.

43

44

45

46

47

48

49

50

51

52

53

54

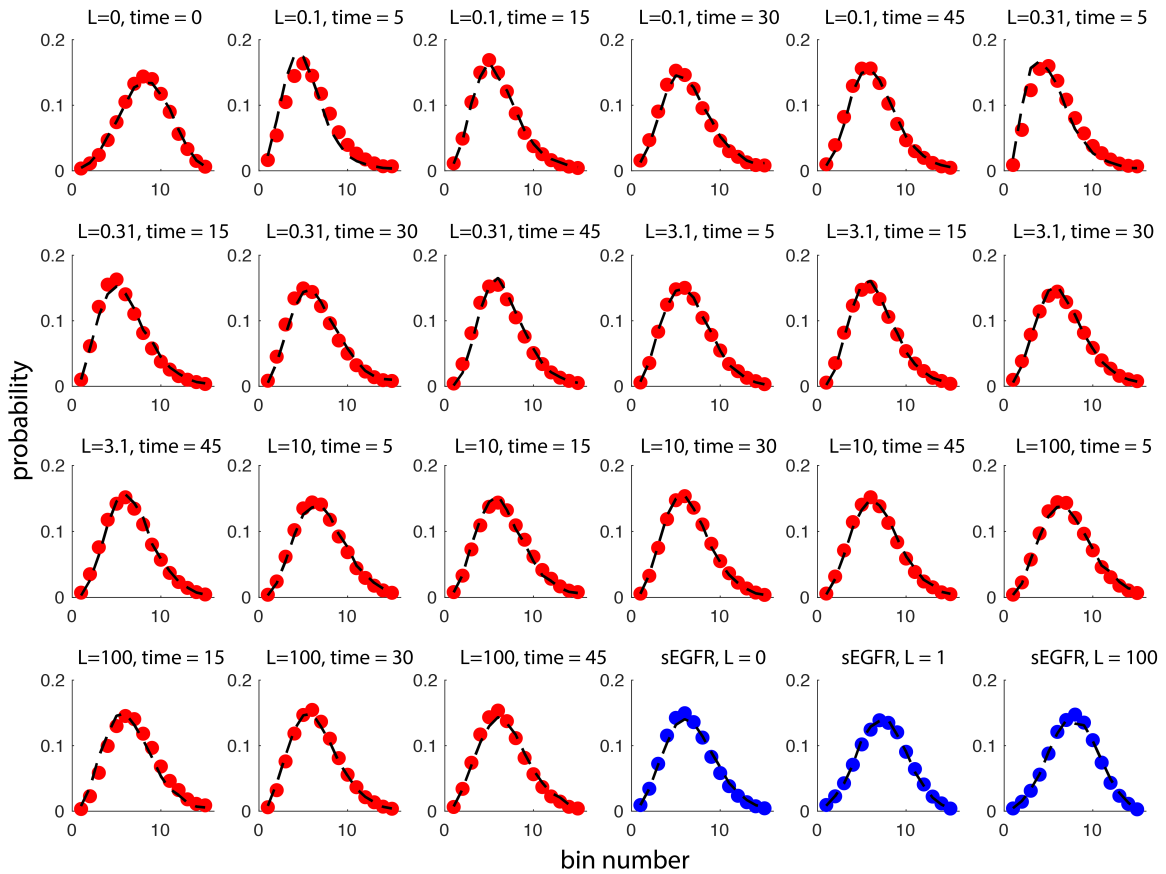

55

56 **Supplemental Information Figure 4. Related to Figure 3. 21 fitted pAkt**  
 57 **distributions and 3 fitted sEGFR distributions used in parameter inference for**  
 58 **synthetic data; parametrization 4: PTEN loss. We show all fitted single cell**  
 59 **distributions (pAkt fits in red, sEGFR fits in blue, *in silico* experimental data in black)**  
 60 **used in the inference.**

61

62

63

64

65

66

67

68

69

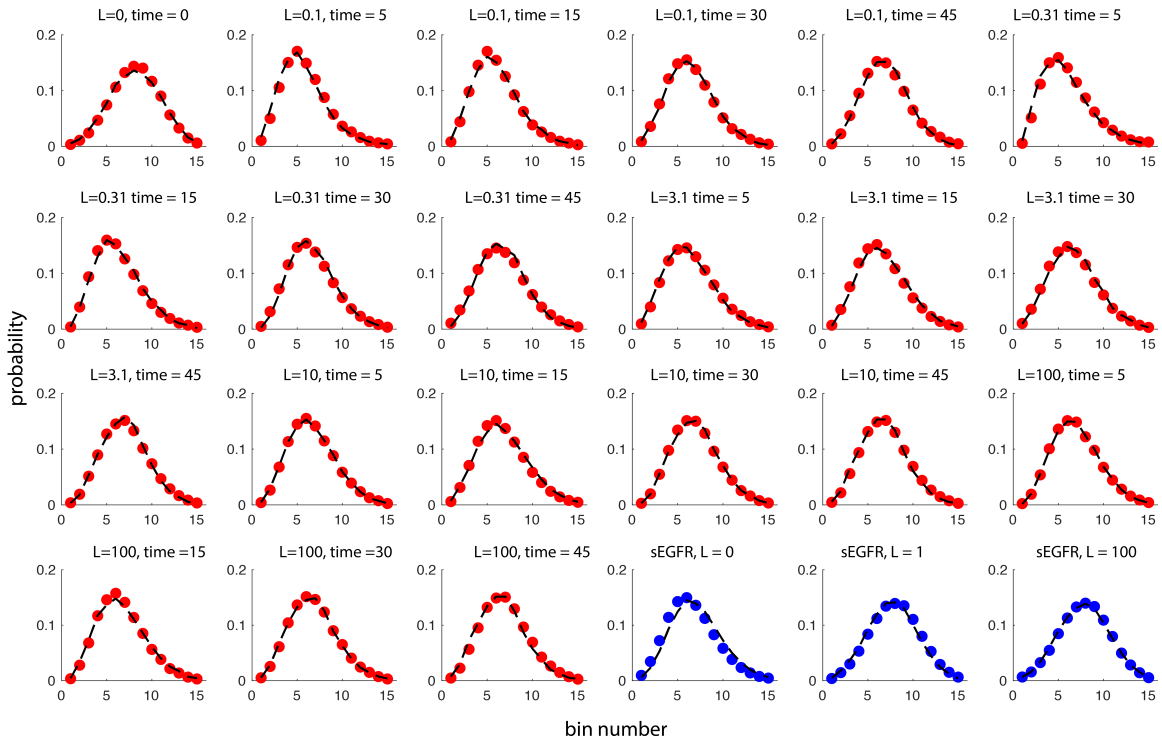

70

71 **Supplemental Information Figure 5. Related to Figure 3. 21 fitted pAkt**  
 72 **distributions and 3 fitted sEGFR distributions used in parameter inference for**  
 73 **synthetic data; parametrization 5: PTEN loss.** We show all fitted single cell  
 74 distributions (pAkt fits in red, sEGFR fits in blue, *in silico* experimental data in black)  
 75 used in the inference.

76

77

78

79

80

81

82

83

84

85

86

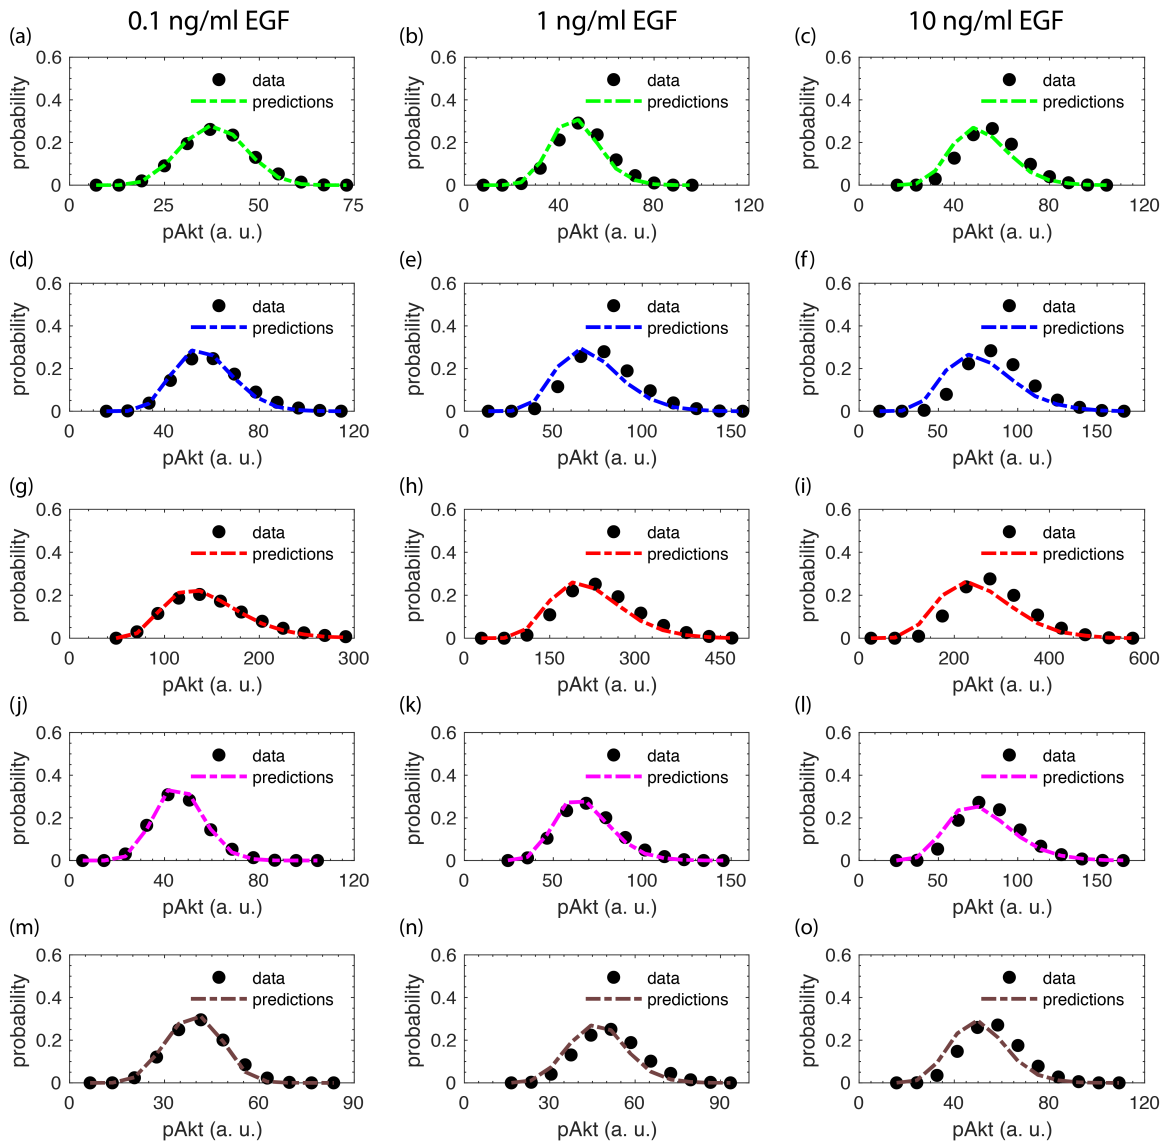

87

88 **Supplemental Information Figure 6. Related to Figure 3. Prediction pAkt levels at**  
 89 **late times for different perturbations to the EGFR pathway.** Comparison between  
 90 single cell heterogeneity in steady state pAkt levels (3 hours of continuous EGF  
 91 stimulation) as observed in *in silico* data (black circles) and MERIDIAN based  
 92 predictions (dashed lines) in the “wild type” parametrization of the EGFR pathway (first  
 93 row, green, a: 0.1 ng/ml EGF, b: 1 ng/ml EGF, c: 10 ng/ml EGF), a parametrization with  
 94 two-fold overexpression of EGFR (second row, blue, d: 0.1 ng/ml EGF, e: 1 ng/ml EGF,  
 95 f: 10 ng/ml EGF), a parametrization with a ten-fold decrease in Akt dephosphorylation  
 96 (third row, red, g: 0.1 ng/ml EGF, h: 1 ng/ml EGF, i: 10 ng/ml EGF), a parametrization  
 97 with a two-fold decrease in EGFR endocytosis rate (fourth row, pink, j: 0.1 ng/ml EGF, k:  
 98 1 ng/ml EGF, l: 10 ng/ml EGF), a parametrization with a two-fold decrease in EGFR  
 99 dephosphorylation (third row, brown, m: 0.1 ng/ml EGF, n: 1 ng/ml EGF, o: 10 ng/ml  
 100 EGF).

101

102

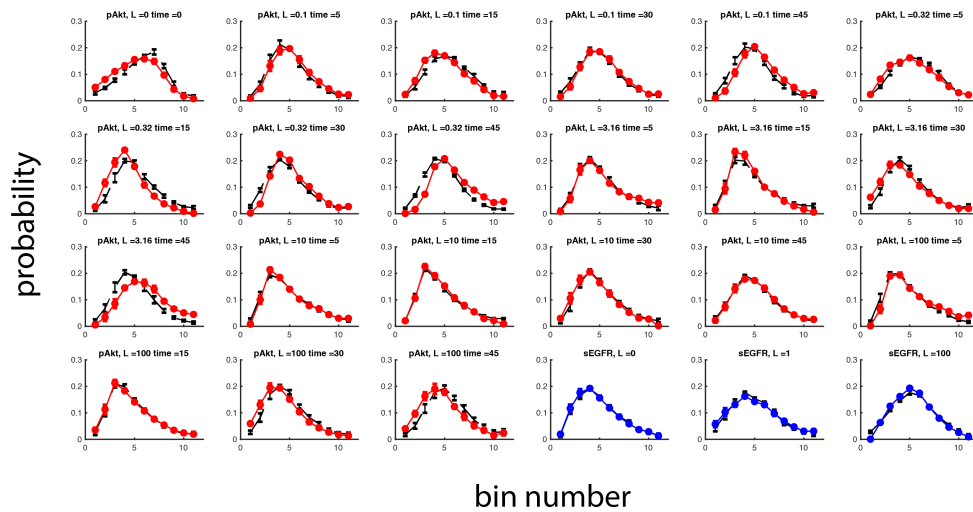

104

105

106 **Supplemental Information Figure 7. Related to Figure 3. 21 fitted pAkt**107 **distributions and 3 fitted sEGFR distributions used in parameter inference. We**

108 show all fitted single cell distributions (pAkt fits in red, sEGFR fits in blue, experimental

109 data in black) used in the inference. Error bars represent experimentally estimated

110 standard errors in the mean and model estimated uncertainties.

111

112

113

114

115

116

117

118

119

120

121

122

123

124

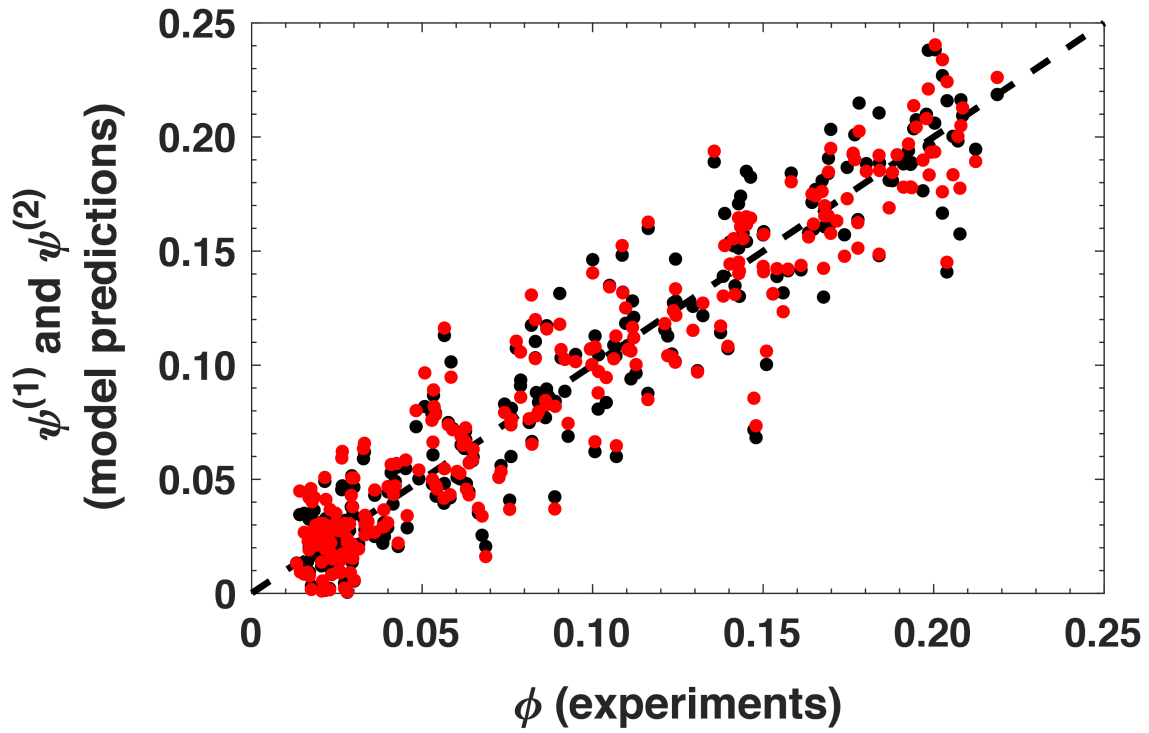

125

126 **Supplemental Information Figure 8. Related to Figure 3. Model predictions agree**  
127 **for two independent calculations.** The correlation between experimentally estimated  
128 bin fractions (x axis) and predicted bin fractions (y axis) for two independent searches  
129 for the Lagrange multipliers (red and blue dots).

130

131

132

133

134

135

136

137

138

139

140



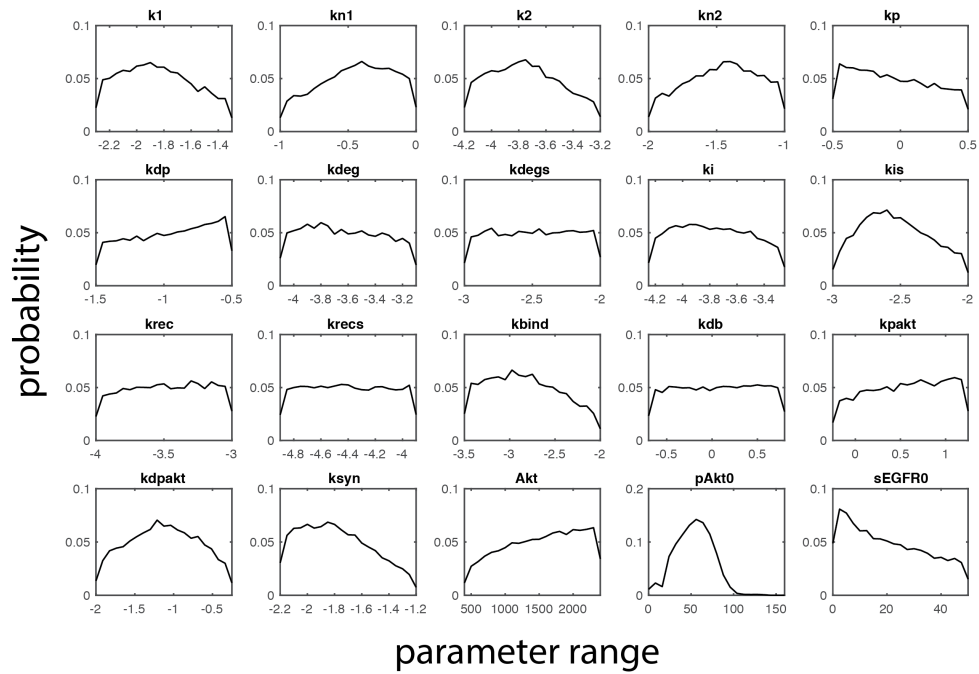

141

142

143 **Supplemental Information Figure 9. Related to Figure 3. Inferred marginal**  
 144 **distributions of all 20 model parameters. Parameters #1 to #17 are on a  $\log_{10}$  scale.**

145

146

147

148

149

150

151

152

153

154

155

156

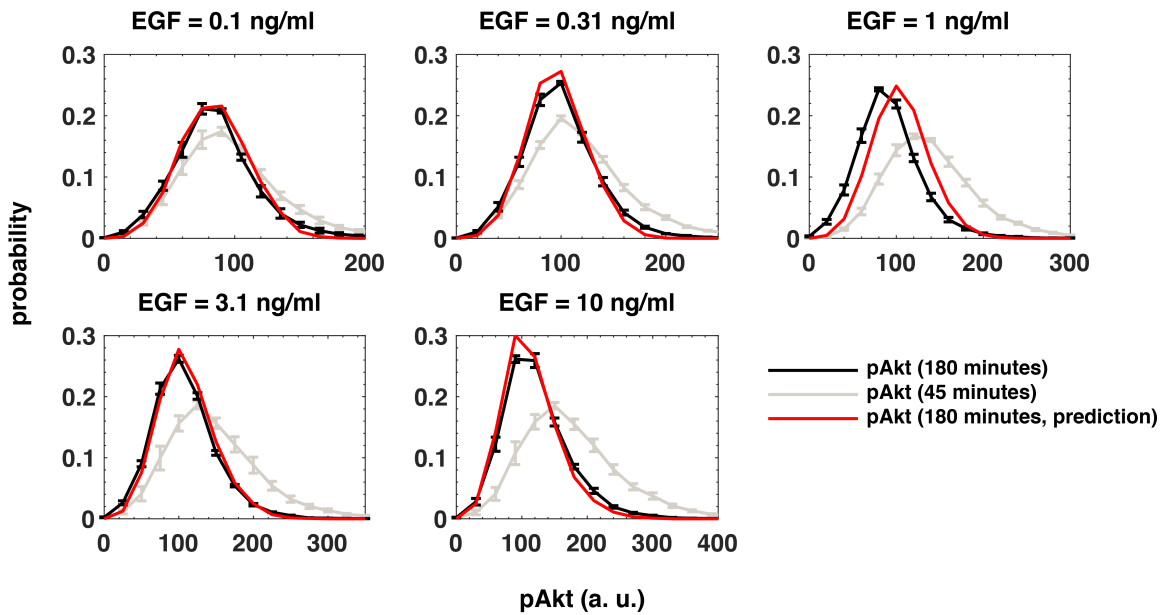

157

158 **Supplemental Information Figure 10. Related to Figure 4. Population dynamics has**  
 159 **not reached steady state at 45 minutes.** We plot single cell distributions of pAkt levels  
 160 at 45 minutes (gray lines) and at 180 minutes (experiments in black lines, model fit in red  
 161 lines) across a broad range of EGF doses. Error bars represent experimentally  
 162 estimated standard errors in the mean. For simplicity, we do not show the model  
 163 estimated uncertainties.

164

165

166

167

168

169

170

171

172

173

174

175

176

| Rate description (and references)                             | Variable           | lower bound<br>(log 10) | upper bound<br>(log 10) | Units                                 |
|---------------------------------------------------------------|--------------------|-------------------------|-------------------------|---------------------------------------|
| EGF binding to EGFR (Schoeberl, Eichler-Jonsson et al. 2002)  | $k_1$              | -2.3                    | -1.3                    | $(\text{ng/ml})^{-1} \text{sec}^{-1}$ |
| EGF unbinding from EGFR (Chen, Schoeberl et al. 2009)         | $k_{-1}$           | -1                      | 0                       | $\text{sec}^{-1}$                     |
| EGF-EGFR and EGFR dimerization (Chen, Schoeberl et al. 2009)  | $k_2$              | -4.2                    | -3.2                    | a. u.                                 |
| EGF-EGFR-EGFR undimerization (Chen, Schoeberl et al. 2009)    | $k_{-2}$           | -2                      | -1                      | $\text{sec}^{-1}$                     |
| EGFR dimer phosphorylation (Chen, Schoeberl et al. 2009)      | $k_{\text{ap}}$    | -0.5                    | 0.5                     | a. u.                                 |
| p-EGFR dephosphorylation (Kleiman, Maiwald et al. 2011)       | $k_{\text{dp}}$    | -1.5                    | -0.5                    | $\text{sec}^{-1}$                     |
| degradation of active EGFRs (Hendriks, Wiley et al. 2003)     | $k_{\text{deg}}^*$ | -3                      | -2                      | $\text{sec}^{-1}$                     |
| degradation of inactive EGFRs (Shankaran, Zhang et al. 2012)  | $k_{\text{deg}}$   | -4.1                    | -3.1                    | $\text{sec}^{-1}$                     |
| EGFR delivery to the membrane                                 | $k_{\text{syn}}$   | -2.2                    | -1.2                    | a. u.                                 |
| Internalization of inactive EGFRs (Wiley, Herbst et al. 1991) | $k_i$              | -4.25                   | -3.25                   | $\text{sec}^{-1}$                     |
| Recycling rate of inactive EGFR (Herbst, Opresko et al. 1994) | $k_{\text{rec}}$   | -4                      | -3                      | $\text{sec}^{-1}$                     |
| Internalization of active EGFRs (Wiley, Herbst et al. 1991)   | $k_i^*$            | -3                      | -2                      | $\text{sec}^{-1}$                     |
| Recycling rate of active EGFRs (Herbst, Opresko et al. 1994)  | $k_{\text{rec}}^*$ | -4.9                    | -3.9                    | $\text{sec}^{-1}$                     |
| effective rate of p-EGFR binding to Akt                       | $k_{\text{bind}}$  | -3.5                    | -2                      | a. u.                                 |
| effective rate of p-EGFR unbinding from pEGFR-Akt             | $k_{\text{db}}$    | -0.7                    | 0.8                     | $\text{sec}^{-1}$                     |
| Rate of pAkt dephosphorylation                                | $k_p$              | -2                      | -0.5                    | $\text{sec}^{-1}$                     |
| Rate of Akt phosphorylation                                   | $k_a$              | -0.25                   | 1.25                    | $\text{sec}^{-1}$                     |
| Total Akt abundance (not log)                                 | Akt                | 400                     | 2400                    | a. u.                                 |
| Background fluorescence in pAkt (not log)                     | $b_0$              | 0                       | 160                     | a. u.                                 |
| Background fluorescence in sEGFR (not log)                    | $s_0$              | 0                       | 50                      | a. u.                                 |

178

179 **Supplemental Information Table 1. Names of parameters and their ranges. Related**  
180 **to Figure 2, 3, and 4.**

181

182

183

184

| <b>Species name</b>                                | <b>Species symbol</b> |
|----------------------------------------------------|-----------------------|
| Free EGF                                           | $u$                   |
| Free EGFR monomer                                  | $R$                   |
| Internalized free EGFR monomer                     | $R_i$                 |
| EGF bound EGFR monomer                             | $B$                   |
| Internalized EGF bound EGFR monomer                | $B_i$                 |
| 1 EGF bound EGFR dimer                             | $D_1$                 |
| Internalized 1 EGF bound EGFR dimer                | $D_{1i}$              |
| 2 EGF bound EGFR dimer                             | $D_2$                 |
| Internalized 2 EGF bound EGFR dimer                | $D_{2i}$              |
| Phosphorylated 1 EGF bound EGFR dimer              | $P_1$                 |
| Internalized phosphorylated 1 EGF bound EGFR dimer | $P_{1i}$              |
| Phosphorylated 2 EGF bound EGFR dimer              | $P_2$                 |
| Internalized phosphorylated 2 EGF bound EGFR dimer | $P_{2i}$              |
| Unphosphorylated Akt                               | $Akt$                 |
| Phosphorylated Akt                                 | $pAkt$                |
| P1 bound to Akt                                    | $P_{1Akt}$            |
| P2 bound to Akt                                    | $P_{2Akt}$            |

185 **Supplemental Information Table 2. Variables names.** Related to Figure 2, 3, and 4.

186

187

188

189

190

191

192

193

194

195

196

197

198 Supplemental Information Tables 3, 4, and 5 are big and are attached as separate  
199 files.

200

| Parameter                 | Correlation   |
|---------------------------|---------------|
| 'k1 '                     | -0.1794       |
| 'kn1 '                    | 0.1565        |
| 'k2 '                     | -0.1888       |
| 'kn2 '                    | 0.0022        |
| 'kp '                     | -0.1053       |
| 'kdp '                    | 0.1197        |
| 'kdeg '                   | 0.2162        |
| 'kdegS '                  | -0.0108       |
| 'ki '                     | 0.3173        |
| 'kis '                    | -0.0439       |
| 'krec '                   | -0.2369       |
| 'krecs '                  | -0.0203       |
| 'kbind '                  | 0.0932        |
| 'kdb '                    | -0.0382       |
| 'kpakt '                  | 0.1088        |
| 'kdpakt'                  | -0.2936       |
| 'ksyn '                   | 0.3183        |
| 'Akt '                    | 0.0938        |
| 'pAkt0 '                  | 0.2874        |
| 'sEGFR0'                  | 0.1032        |
| <b>sEGFR steady state</b> | <b>0.3954</b> |

201

202 Supplemental Information Table 6. Correlation of parameters with steady state  
203 pAkt levels at EGF = 10 ng/ml. Related to Figure 4.

204

205

206

207

208

209

| <b>Allowed ranges</b> | <b>Experimental</b> |             | <b>In silico</b> |             |
|-----------------------|---------------------|-------------|------------------|-------------|
|                       |                     |             |                  |             |
| <b>pAkt</b>           | lowe bound          | upper bound | lower bound      | upper bound |
| 0 ng/ml               | 1.0123              | 139         | 1.0123           | 139         |
| 0.1 ng/ml 5min        | 6.2849              | 276.6       | 6.2849           | 276.6       |
| 0.1 ng/ml 15min       | 7.1279              | 321.6       | 7.1279           | 321.6       |
| 0.1 ng/ml 30min       | 2.0056              | 265.6       | 2.0056           | 265.6       |
| 0.1 ng/ml 45min       | 3.6327              | 263         | 3.6327           | 263         |
| 0.31 ng/ml 5min       | 11.9039             | 441.8       | 11.9039          | 441.8       |
| 0.31 ng/ml 15min      | 15.9734             | 540.6       | 15.9734          | 540.6       |
| 0.31 ng/ml 30min      | 6.1803              | 396.9       | 6.1803           | 396.9       |
| 0.31 ng/ml 45min      | 6.1442              | 281.4       | 6.1442           | 281.4       |
| 3.1 ng/ml 5min        | 14.2768             | 896         | 14.2768          | 896         |
| 3.1 ng/ml 15min       | 20.48               | 857.6       | 20.48            | 857.6       |
| 3.1 ng/ml 30min       | 37.5317             | 563         | 37.5317          | 563         |
| 3.1 ng/ml 45min       | 4.3151              | 344.4       | 4.3151           | 344.4       |
| 10 ng/ml 5min         | 52.7802             | 1123        | 52.7802          | 1123        |
| 10 ng/ml 15min        | 19.1342             | 869.4       | 19.1342          | 869.4       |
| 10 ng/ml 30min        | 12.4531             | 627.2       | 12.4531          | 627.2       |
| 10 ng/ml 45min        | 7.0271              | 397.3       | 7.0271           | 397.3       |
| 100 ng/ml 5min        | 26.5866             | 1235.6      | 26.5866          | 1235.6      |
| 100 ng/ml 15min       | 13.3069             | 921.2       | 13.3069          | 921.2       |
| 100 ng/ml 30min       | 18.592              | 620.9       | 18.592           | 620.9       |
| 100 ng/ml 45min       | 12.5386             | 462.9       | 12.5386          | 462.9       |
|                       |                     |             |                  |             |
| <b>sEGFR</b>          | lower bound         | upper bound | lower bound      | upper bound |
| 0 ng/ml               | 102.7394            | 664.5042    | 102.7394         | 664.5042    |
| 1 ng/ml               | 23.4873             | 198.7291    | 23.4873          | 198.7291    |
| 100 ng/ml             | 0.0819              | 106.7056    | 0.0819           | 106.7056    |

211

212 **Supplemental Information Table 7. Allowed upper and lower bounds for pAkt and**  
213 **sEGFR when inferring parameter distributions from data. Related to Figure 3 and**  
214 **4.**
